# Supplementary material for: SbDREB2A, an A-2 type DREB transcription factor from extreme halophyte Salicornia brachiata confers abiotic stress tolerance in Escherichia coli
Source: Springer Nature journal article supplement (doi:10.1007/s00299-010-0896-7), 2010-07-16
Supplement: MOESM1 [file 299_2010_896_MOESM1_ESM.docx]

Fig 1 A. Multiple sequence alignment of some SbDREB2A protein and other homologs. The ERF/AP2 domain is underlined, asterisks indicate the conserved valine (V) and glutamic acid (E) at the 14th and the 19th position in the ERF/AP2 domain. Putative phosphorylation sites for PKC and CK2 are marked by arrowhead and plus shapes, respectively. Nuclear localization signal is shown by top line. A second motif at carboxy-terminal is shown by dotted line on top, which is found similar to HaDREB2

Fig 1 B. Phylogenetic relationship of SbDREB2A with other DREB proteins is illustrated by Tree View produced by MEGA 4. The GenBank accession numbers are as follows: *AhDREB1* (AF274033), AsDREB2 (ABS11171), AtABI4 (A0MES8) AtDREB1A (AB007787) AtDREB1B (AB007788) AtDREB1C (AB007789), AtDREB2A (AB007790), AtDREB2B (AB007791), AtRAP2 (AAP04063), AtRAP2.1 (Q8LC30) AtRAP2.10 (Q9SW63), AtRAP2.4 (NP_177931), AtTINY (Q39127), CaDREBLP1 (AY496155), CdDREB2 (AAS46285), FaDREB2A (AJ717396), GhDBP1 (AY174160), GhDBP1L(ABD65473), GhDBP2 (AAT39542), GhDBP3 (DQ224382), GhDBP4 (DQ224383), GhDREB1L (DQ409060), GmDREB2 (ABB36645), GmDREBa (AAT12423), GmDREBb (AAQ57226), GmDREBc (AAP83131), HaDREB2, HbDREB2 (AY728807), HvCBF1 (AF418204), HvCBF2 (AF442489), HvDRF1.1 (AY223807), OsDREB1 (AY064403), OsDREB2A (AF300971), OsDREB3 (NP_001048142), PeDREB2 (DQ337191), PgDREB2A (AAV90624), PpDREB2 (AAS59530), SbDREB2A (GU592205), ScCBF (AAL35759), T.hDREB2B (EF653377), TaCBF1 (AF376136), TaDREB1 (DQ195068), TaDREB6 (AAX13289), ZmABI4 (AY125490), ZmDBF1( AAM80486)
